# Supplementary material
Source: PubMed Central journal article supplement (PMC6065196)
Supplement: supp_RA117.001337_134493_1_supp_131357_p848fm.pdf [file supp_RA117.001337_134493_1_supp_131357_p848fm.pdf]

High Glucose Reduces Megalin-Mediated Albumin Endocytosis in Renal Proximal Tubule Cells through Protein Kinase B *O*-GlcNAcylation

**Diogo de Barros Peruchetti, Rodrigo Pacheco Silva-Aguiar, Gabriela Marques Siqueira, Wagner Barbosa Dias, Celso Caruso-Neves**

Figure S1

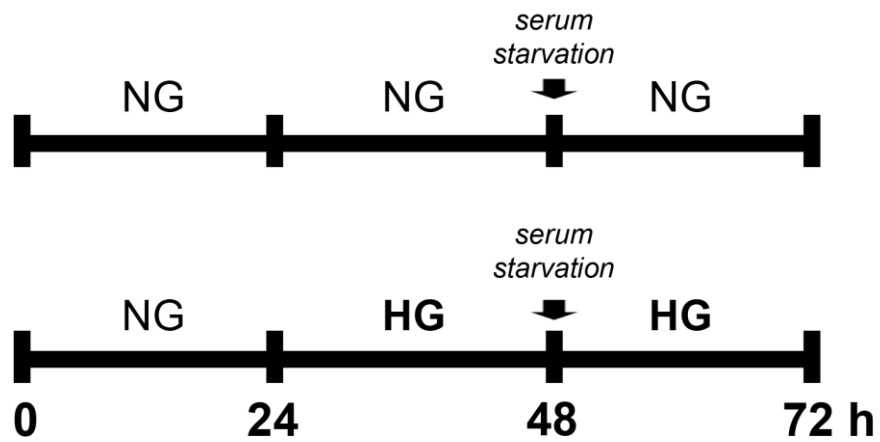

**Figure S1. Experimental design.**

Figure S2

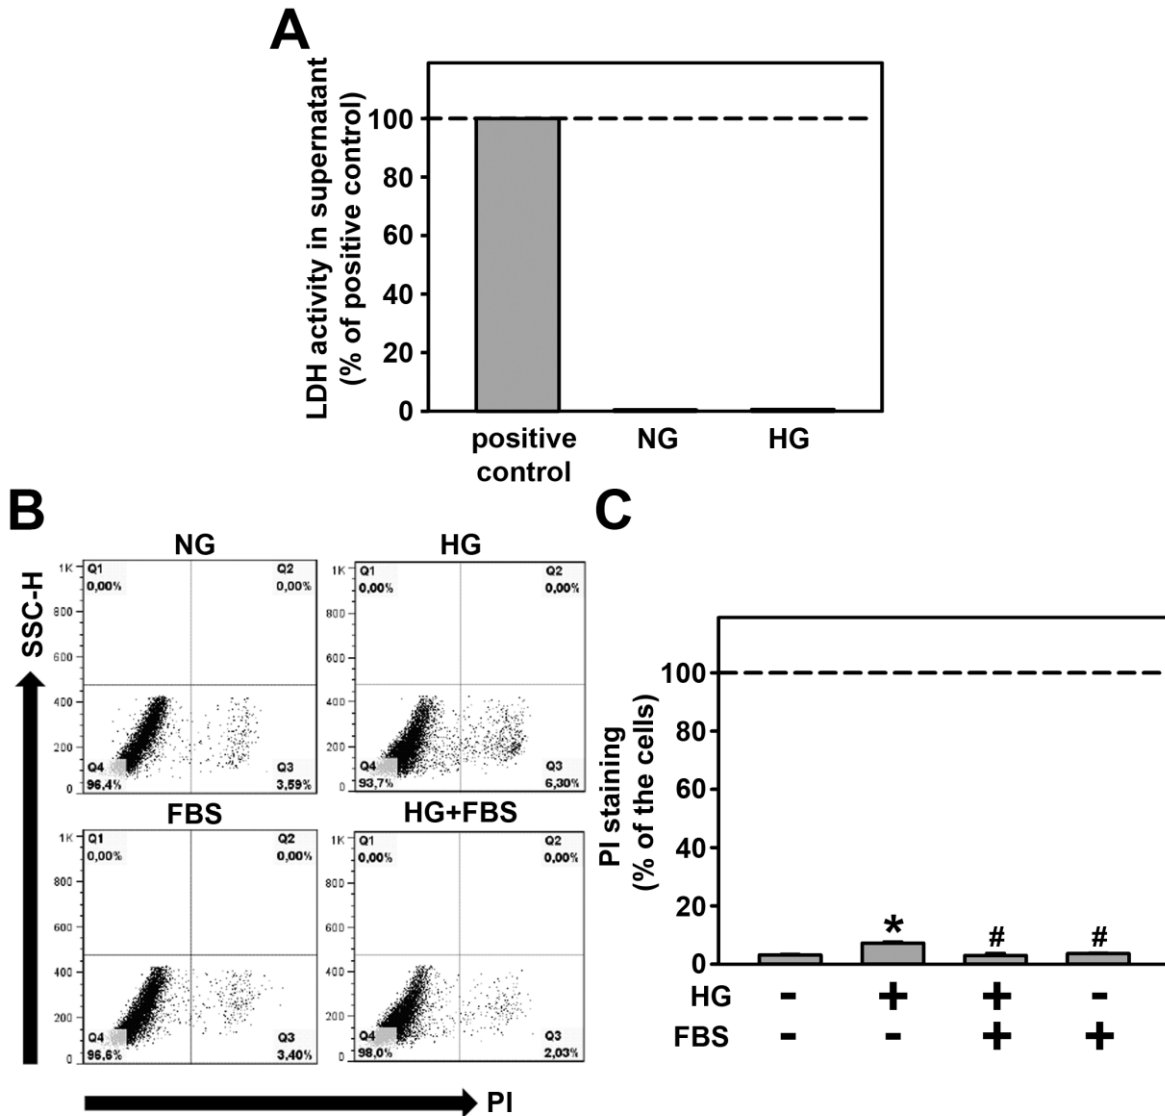

**Figure S2. Cell viability analyses.** A, cell viability in the presence of HG determined by lactate dehydrogenase (LDH) activity in cell supernatant (n=6). A LLC-PK1 cell lysate was used as positive control for LDH activity. B, C, cell viability in the presence of HG and/or FBS determined by propidium iodide (PI) staining using FACS (n=4). A representative dot plot diagram is shown in B. The frequency of PI-positive cells is shown in the right lower quadrant. Quantitative analysis of PI staining is shown in C. NG, normal glucose; HG, high glucose; FBS, fetal bovine serum. The results are shown as means  $\pm$  SE. \*P < 0.05 versus NG; #P < 0.05 versus HG.

Figure S3

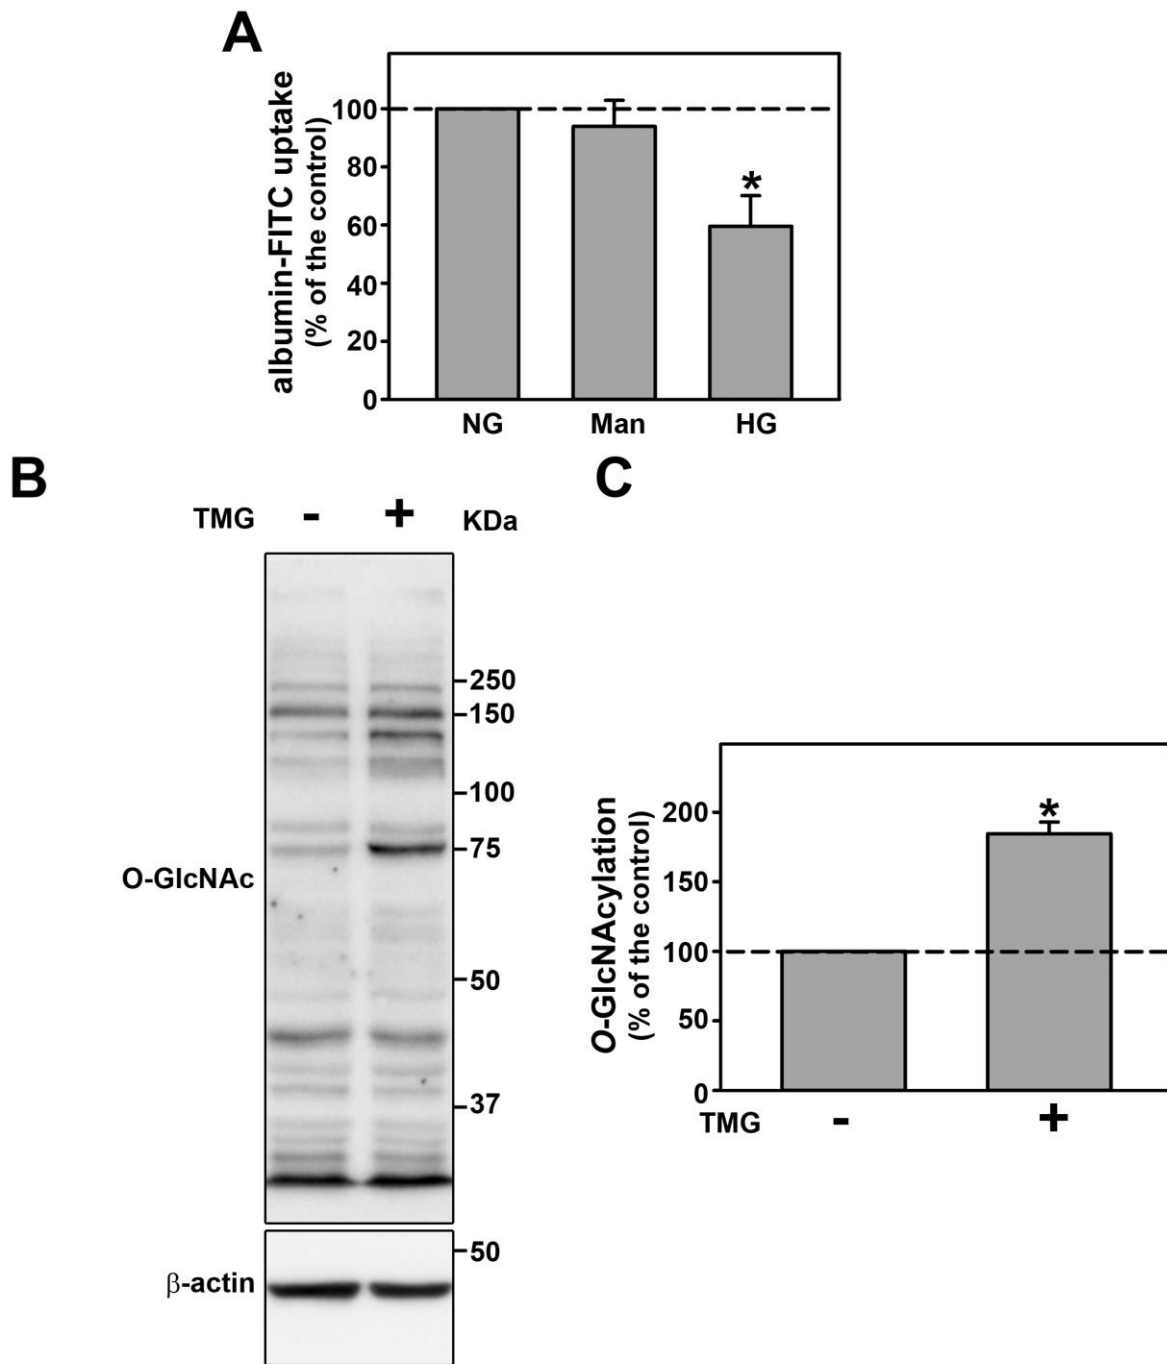

**Figure S3.** A, comparison of the effects of mannitol and HG on albumin endocytosis (n=6). B, C, the effect of 1.0  $\mu$ M TMG on O-GlcNAcylation (n=6). C, densitometry analysis of B. NG, normal glucose; Man, mannitol; HG, high glucose; TMG, Thiamet G (an OGA inhibitor). The results are shown as means  $\pm$  SE. \*P < 0.05 versus NG.
